# Supplementary material for: Filling in the Gap of Human Chromosome 4: Single Molecule Real Time Sequencing of Macrosatellite Repeats in the Facioscapulohumeral Muscular Dystrophy Locus
Source: PLoS One. 2016 Mar 22;11(3):e0151963. doi: 10.1371/journal.pone.0151963 (PMC4803325; doi:10.1371/journal.pone.0151963)
Supplement: S2 Table — (XLSX) [file pone.0151963.s009.xlsx]

## Sheet: Sheet1
RP11-242C23 and Contigs	Start	End	Fragment start	Fragment end	Fragment size
CT476828.7	1	7486	1	7486
scf7180000000013	7487	11288	1	3801	3801
CT476828.7	11289	24498	11289	24498
FRG2 Consensus	24499	29499	1	5096	5096
CT476828.7	29500	33900	29500	33900
scf7180000000010	33901	65274	1	31374	31374
CT476828.7	65275	70215	65275	70215
scf7180000000012	70216	111416	1	41097	41097
D4Z4_13-pLAM Consensus	111417	114957	267	3806	3806
CT476828.7	114958	129120	111417	129120
